# Supplementary figures and images for: Changes in Alcohol Habits Among Workers During the Confinement of COVID-19: Results of a Canadian Cross-Sectional Survey
Source: PubMed Central journal article supplement — Subst Abuse. 2021 Jul 16;15:11782218211033298. doi: 10.1177/11782218211033298 (PMC8287356; doi:10.1177/11782218211033298), 2021-07-16

**A**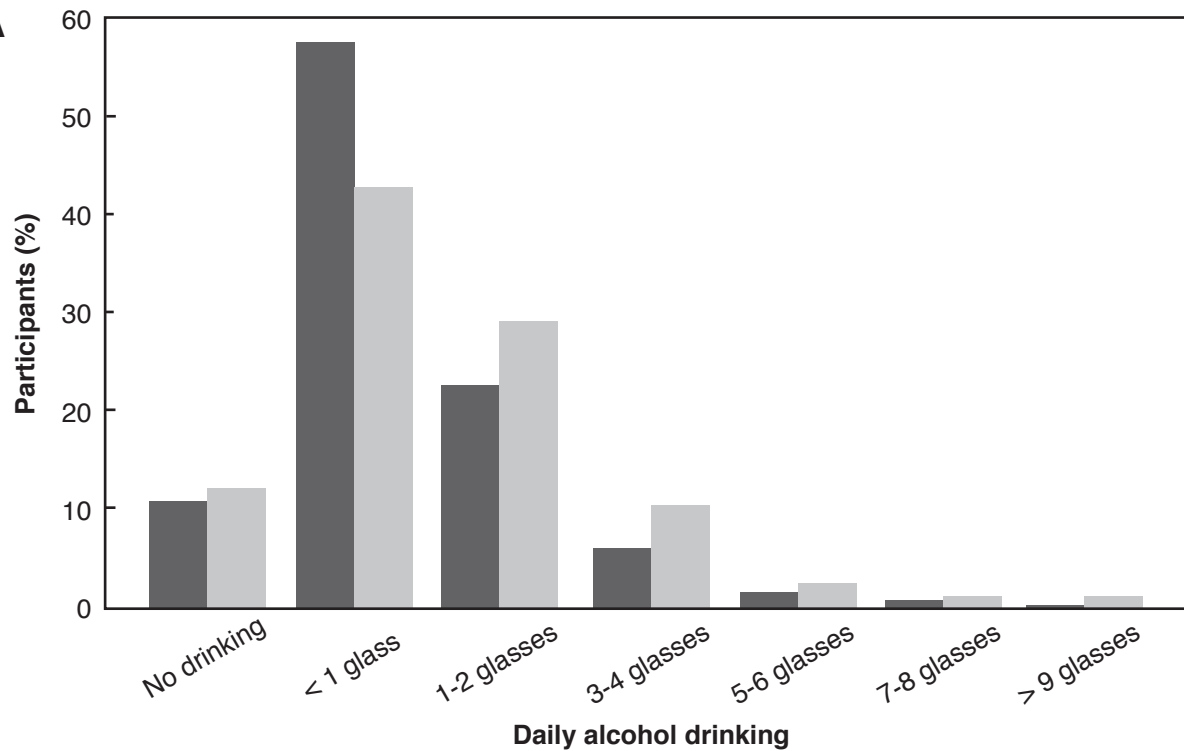**B**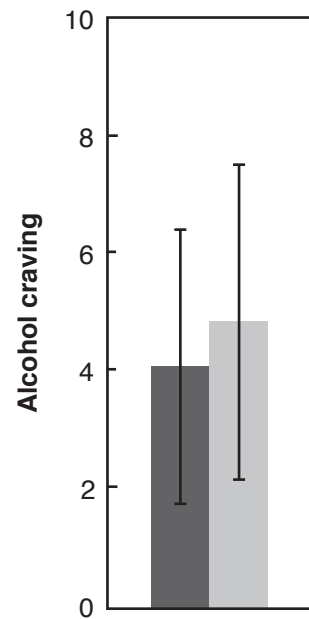**C**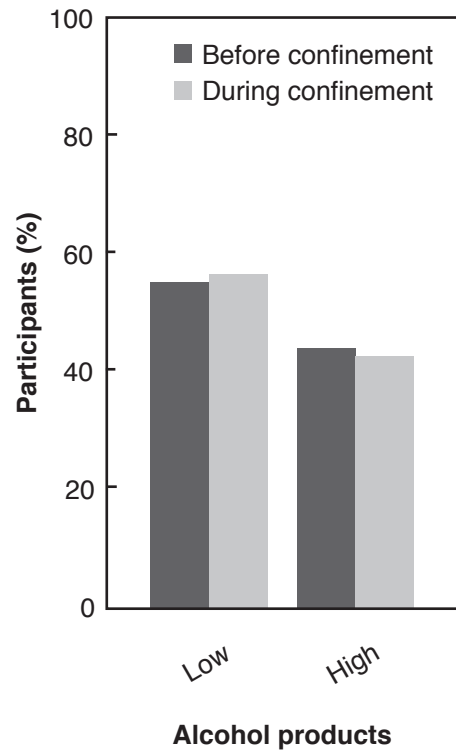

Supplement: sj-pdf-1-sat-10.1177_11782218211033298.pdf [file sj-pdf-1-sat-10.1177_11782218211033298.pdf]
